# Supplementary material for: Clinical manifestations and prognostic factors analysis of patients hospitalised with acute exacerbation of idiopathic pulmonary fibrosis and other interstitial lung diseases
Source: PubMed Central journal article supplement — BMJ Open Respir Res. 2024 Feb 27;11(1):e001997. doi: 10.1136/bmjresp-2023-001997 (PMC10900369; doi:10.1136/bmjresp-2023-001997), 2024-02-27
Supplement: bmjresp-2023-001997supp001.pdf [file bmjresp-2023-001997supp001.pdf]

Supplementary Table 1 Comparison of characteristics between survivors and non-survivors in patients with AE-ILD

| Variables                                       | survivors (N=323) |               | non-survivors (N=83) |               | p      |
|-------------------------------------------------|-------------------|---------------|----------------------|---------------|--------|
|                                                 | n/X/M             | %/S/Q1-Q3     | n/X/M                | %/S/Q1-Q3     |        |
| <b>Baseline characteristics</b>                 |                   |               |                      |               |        |
| Men                                             | 191               | 59.10%        | 59                   | 71.10%        | 0.046  |
| Age                                             | 65                | (60,73)       | 67                   | (61,74)       | 0.298  |
| BMI                                             | 24.12             | (21.93,26.96) | 24.06                | (22.51,25.83) | 0.863  |
| Smoker(current/ex)                              | 168               | 52.01%        | 45                   | 54.22%        | 0.720. |
| Duration of pre-existing<br>ILD(m)              | 10                | (0,36)        | 3                    | (0,24)        | 0.216  |
| Exacerbation duration before<br>admission(d)    | 20                | (10,30)       | 10                   | (5,20)        | <0.001 |
| No former ILD diagnosis                         | 91                | 28.17%        | 23                   | 27.71%        | 0.933  |
| Arterial hypertension                           | 127               | 39.32%        | 35                   | 42.17%        | 0.636  |
| Diabetes mellitus                               | 95                | 29.41%        | 28                   | 33.73%        | 0.445  |
| Coronary artery disease<br>and/or heart failure | 101               | 31.27%        | 44                   | 53.01%        | <0.001 |
| PAH                                             | 82                | 25.39%        | 32                   | 38.55%        | 0.017  |
| Lung cancer                                     | 5                 | 1.55%         | 3                    | 3.61%         | 0.211  |
| Tachyarrhythmia                                 | 18                | 5.57%         | 16                   | 19.28%        | <0.001 |
| Family history of pulmonary<br>fibrosis         | 9                 | 2.86%         | 2                    | 2.44%         | 1.000. |
| <b>Symptoms</b>                                 |                   |               |                      |               |        |
| Cough                                           | 299               | 92.57%        | 76                   | 91.57%        | 0.759  |
| Expectoration                                   | 226               | 69.97%        | 59                   | 71.08%        | 0.843  |
| Non-purulent                                    | 185               | 81.9%         | 51                   | 86.4%         |        |
| Purulent                                        | 41                | 18.1%         | 8                    | 13.6%         | 0.406  |
| Chest pain                                      | 25                | 7.74%         | 6                    | 7.23%         | 0.876  |
| Dyspnea                                         | 266               | 82.35%        | 73                   | 87.95%        | 0.220. |
| Fever                                           | 152               | 59.84%        | 30                   | 50.85%        | 0.207  |
| <b>physical examination</b>                     |                   |               |                      |               |        |
| Respiratory rate                                | 20                | (20,22)       | 21                   | (20,28)       | <0.001 |
| Heart Rate                                      | 90                | (80,100)      | 96                   | (82,110)      | 0.003  |
| Bilateral basal crackles                        | 214               | 66.67%        | 39                   | 47.56%        | 0.001  |
| Clubbing                                        | 60                | 18.58%        | 11                   | 13.25%        | 0.255  |
| <b>laboratory data</b>                          |                   |               |                      |               |        |
| WBC                                             | 8.79              | (6.765,10.98) | 9.92                 | (7.26,13.32)  | 0.017  |
| N%                                              | 72                | (63.8,81.6)   | 83.6                 | (75.2,89.6)   | <0.001 |
| HGB                                             | 130               | (119,146)     | 128                  | (114,141)     | 0.061  |
| PLT                                             | 236               | (190.5,299)   | 217                  | (153,312)     | 0.096  |
| ALB                                             | 35.6              | (32.65,37.9)  | 33.6                 | (29.8, 36.5)  | <0.001 |
| CHOL                                            | 4.235             | (3.515,4.995) | 3.99                 | (3.31, 4.83)  | 0.048  |
| LDL                                             | 2.7               | (2.1,3.468)   | 2.425                | (1.8, 3.088)  | 0.022  |
| CK                                              | 46                | (32,70)       | 47                   | (31, 64.25)   | 0.551  |
| LDH                                             | 296.6             | 97.57         | 436.14               | 247.16        | <0.001 |
| HBDH                                            | 228               | (191,297.25)  | 326                  | (258,442.5)   | <0.001 |
| GGT                                             | 30                | (20,46)       | 42                   | (27,66)       | 0.001  |
| Urea                                            | 5.32              | (4.033,6.933) | 7.25                 | (5.17,10.25)  | <0.001 |
| CREA                                            | 60.8              | (51.4,72.8)   | 60.7                 | (52,77.3)     | 0.34   |
| CK-MB                                           | 0.9               | (0.4, 1.688)  | 1.15                 | (0.6, 2.225)  | 0.041  |

|                                    |            |                   |      |              |        |
|------------------------------------|------------|-------------------|------|--------------|--------|
| CRP                                | 1.54       | (0.66,6)          | 7.67 | (2.03, 13.5) | <0.001 |
| D-dimer                            | (n=237)800 | (357.295,1569.78) | 1772 | (622, 4550)  | <0.001 |
| Respiratory failure upon admission | 219        | 68.65%            | 71   | 85.54%       | 0.002  |
| <b>Treatment and Prognosis</b>     |            |                   |      |              |        |
| ICU admission                      | 19         | 6.25%             | 29   | 37.18%       | <0.001 |
| Bronchoscopy performed             | 69         | 24.21%            | 26   | 35.62%       | 0.049  |
| Mechanic Ventilation               | 45         | 14.24%            | 67   | 80.72%       | <0.001 |
| Steroids                           | 233        | 72.10%            | 170  | 79.50%       | 0.173  |
| Antibiotics                        | 171        | 52.94%            | 59   | 71.08%       | 0.003  |
| <b>Steroid dose and mortality</b>  |            |                   |      |              |        |
| none                               | 233        | 72.10%            | 170  | 79.50%       | 0.173  |
| <1mg/kg/d                          | 145        | 44.90%            | 19   | 22.90%       | <0.001 |
| 1-2mg/kg/d                         | 73         | 22.60%            | 29   | 34.90%       | 0.021  |
| >2mg/kg/d                          | 15         | 4.60%             | 18   | 21.70%       | <0.001 |
| Hospitalization length             | 13         | (9,17)            | 11   | (7,21)       | 0.149  |

AE-ILD: acute exacerbation of interstitial lung disease; BMI, body mass index; ICU, intensive care unit; PAH, pulmonary hypertension; WBC, white blood cell; N, neutrophil; HGB, hemoglobin; PLT, platelet; ALB, albumin; CHOL, cholesterol; LDL, low-density lipoprotein; CK, Creatine kinase; LDH, Lactate dehydrogenase; HBDH, hydroxybutyrate dehydrogenase; GGT,  $\gamma$ -glutamyl transferase; Urea, urea nitrogen; CREA, serum creatinine; CK-MB, creatine kinase isoenzymes; CRP, C-reactive protein

Supplementary Table 2 Comparison of characteristics between survivors and non-survivors in patients with AE-IPF

| Variables                                    | survivors (N=69) |           | non-survivors (N=24) |           | p     |
|----------------------------------------------|------------------|-----------|----------------------|-----------|-------|
|                                              | n/X/M            | %/S/Q1-Q3 | n/X/M                | %/S/Q1-Q3 |       |
| <b>Baseline characteristics</b>              |                  |           |                      |           |       |
| Men                                          | 58               | 84.10%    | 23                   | 95.80%    | 0.176 |
| Age                                          | 64               | (61,72)   | 65                   | (61,72)   | 0.775 |
| BMI                                          | 23.81            | (22,26)   | 23.53                | (21,26)   | 0.817 |
| Smoker                                       | 36               | 52.20%    | 6                    | 25.00%    | 0.021 |
| Duration of pre-existing ILD(m)              | 20               | 93,48)    | 15.5                 | (2,57)    | 0.951 |
| Exacerbation duration before admission(d)    | 18               | (10,30)   | 10                   | (5,20)    | 0.008 |
| No former ILD diagnosis                      | 7                | 10.10%    | 2                    | 8.30%     | 1.000 |
| Arterial hypertension                        | 31               | 44.90%    | 12                   | 50.00%    | 0.668 |
| Diabetes mellitus                            | 24               | 34.80%    | 8                    | 33.30%    | 0.898 |
| Coronary artery disease and/or heart failure | 31               | 44.90%    | 15                   | 62.50%    | 0.138 |
| PAH                                          | 20               | 29.00%    | 16                   | 66.70%    | 0.001 |
| Lung cancer                                  | 2                | 2.90%     | 1                    | 4.20%     | 1.000 |
| Tachyarrhythmia                              | 5                | 7.20%     | 3                    | 12.50%    | 0.421 |
| Family history of pulmonary fibrosis         | 4                | 5.80%     | 2                    | 8.30%     | 0.646 |
| <b>Symptoms</b>                              |                  |           |                      |           |       |
| Cough                                        | 64               | 92.80%    | 23                   | 95.80%    | 1.000 |
| Expectoration                                | 51               | 73.9%     | 19                   | 79.2%     | 0.607 |
| Non-purulent                                 | 45               | 88.2%     | 15                   | 78.9%     |       |
| Purulent                                     | 6                | 11.8%     | 4                    | 21.1%     | 0.443 |
| Chest pain                                   | 6                | 8.70%     | 0                    | 0.00%     | 0.333 |
| Dyspnea                                      | 54               | 78.30%    | 20                   | 83.30%    | 0.596 |
| Fever                                        | 17               | 24.60%    | 15                   | 62.50%    | 0.001 |
| <b>physical examination</b>                  |                  |           |                      |           |       |
| Respiratory rate                             | 20               | (20,22)   | 21.5                 | (20,28)   | 0.019 |

|                                    |        |              |        |              |        |
|------------------------------------|--------|--------------|--------|--------------|--------|
| Heart Rate                         | 90     | (81,100)     | 99     | (82,117)     | 0.023  |
| Bilateral basal crackles           | 53     | 76.80%       | 12     | 50.00%       | 0.014  |
| Clubbing                           | 17     | 24.60%       | 5      | 20.80%       | 0.706  |
| <b>laboratory data</b>             |        |              |        |              |        |
| WBC                                | 8.3    | (6,10)       | 13.09  | (9.72,14)    | <0.001 |
| N%                                 | 67.55  | (61.6,76.48) | 85.85  | (72.8,93.1)  | <0.001 |
| HGB                                | 138.04 | ±19.55       | 133.08 | ±16.84       | 0.272  |
| PLT                                | 210.5  | ' (167,256)  | 202    | ' (146,323)  | 0.742  |
| ALB                                | 36.49  | ±3.36        | 34.93  | ±7.00        | 0.306  |
| CHOL                               | 4.22   | ±0.99        | 3.7122 | ±0.95        | 0.037  |
| LDL                                | 3.1    | ±3.13        | 2.25   | ±0.81        | 0.204  |
| CK                                 | 53.35  | ±26.05       | 68.28  | ±77.08       | 0.362  |
| LDH                                | 282.08 | ±74.04       | 474.54 | ±383.52      | 0.023  |
| HBDH                               | 234    | ±60.83       | 382.63 | ±297.16      | 0.023  |
| GGT                                | 28     | (21.5,41.5)  | 36.5   | (22.25,53.5) | 0.123  |
| Urea                               | 5.63   | ±1.78        | 8.03   | ±3.12        | 0.001  |
| CREA                               | 64.81  | ±15.66       | 76.4   | ±30.97       | 0.091  |
| CK-MB                              | 1      | (0.4,1.55)   | 1.5    | (0.6,2.7)    | 0.067  |
| CRP                                | 0.91   | (0.51,3.02)  | 8.16   | (2.19,13.73) | <0.001 |
| D-dimer                            | 544.3  | ' (320,1201) | 2080   | (703.3,4993) | 0.009  |
| Respiratory failure upon admission | 54     | 78.30%       | 20     | 83.30%       | 0.596  |
| <b>Treatment and Prognosis</b>     |        |              |        |              |        |
| ICU admission                      | 2      | 2.90%        | 5      | 20.80%       | 0.012  |
| Bronchoscopy performed             | 14     | 20.30%       | 4      | 16.70%       | 1.000  |
| Mechanic Ventilation               | 10     | 14.50%       | 18     | 75.00%       | <0.001 |
| Steroids                           | 43     | 62.30%       | 18     | 75.00%       | 0.260  |
| Antibiotics                        | 53     | 76.80%       | 22     | 91.70%       | 0.142  |
| Steroid dose and mortality         |        |              |        |              |        |
| none                               | 26     | 37.70%       | 6      | 25.00%       | 0.260  |
| <1mg/kg/d                          | 29     | 42.00%       | 6      | 25.00%       | 0.138  |
| 1-2mg/kg/d                         | 13     | 18.80%       | 6      | 25.00%       | 0.519  |
| >2mg/kg/d                          | 1      | 1.40%        | 6      | 25.00%       | 0.001  |
| Hospitalization length             | 13     | (9,15)       | 10.5   | (4,19)       | 0.215  |

AE-IPF: acute exacerbation of idiopathic pulmonary fibrosis; BMI, body mass index; ICU, intensive care unit; PAH, pulmonary hypertension; WBC, white blood cell; N, neutrophil; HGB, hemoglobin; PLT, platelet; ALB, albumin; CHOL, cholesterol; LDL, low-density lipoprotein; CK, Creatine kinase; LDH, Lactate dehydrogenase; HBDH, hydroxybutyrate dehydrogenase; GGT,  $\gamma$ -glutamyl transferase; Urea, urea nitrogen; CREA, serum creatinine; CK-MB, creatine kinase isoenzymes; CRP, C-reactive protein.

Supplementary Table 3 Comparison of characteristics between survivors and non-survivors in patients with AE-non-IPF ILD

| Variables                                 | survivors (N=254) |               | non-survivors (N=59) |               | <i>p</i> |
|-------------------------------------------|-------------------|---------------|----------------------|---------------|----------|
|                                           | n/X/M             | %/S/Q1-Q3     | n/X/M                | %/S/Q1-Q3     |          |
| Baseline characteristics                  |                   |               |                      |               |          |
| Men                                       | 133               | 52.40%        | 36                   | 61.00%        | 0.230    |
| Age                                       | 66                | (59,73)       | 67                   | (59,76)       | 0.325    |
| BMI                                       | 24.16             | (21.72,27.13) | 24.16                | (22.46,25.56) | 0.907    |
| Smoker                                    | 118               | 47.00%        | 27                   | 46.00%        | 0.923    |
| Duration of pre-existing ILD(m)           | 6                 | (0,36)        | 2                    | (0,24)        | 0.095    |
| Exacerbation duration before admission(d) |                   |               |                      |               |          |
|                                           | 20                | (10,30)       | 13                   | (5,30)        | 0.003    |
| No former ILD diagnosis                   | 84                | 33.10%        | 21                   | 35.60%        | 0.712    |

|                                              |         |               |         |                 |        |
|----------------------------------------------|---------|---------------|---------|-----------------|--------|
| Arteria hypertension                         | 96      | 37.80%        | 23      | 39.00%          | 0.866  |
| Diabetes mellitus                            | 71      | 28.00%        | 20      | 33.90%          | 0.365  |
| Coronary artery disease and/or heart failure | 70      | 27.60%        | 29      | 49.20%          | 0.001  |
| PAH                                          | 62      | 24.40%        | 16      | 27.10%          | 0.665  |
| Lung cancer                                  | 3       | 1.20%         | 2       | 3.40%           | 0.239  |
| Tachyarrhythmia                              | 13      | 5.10%         | 13      | 22.00%          | <0.001 |
| Family history of pulmonary fibrosis         | 5       | 2.00%         | 0       | 0.00%           | 0.588  |
| <b>Symptoms</b>                              |         |               |         |                 |        |
| Cough                                        | 235     | 92.50%        | 53      | 89.80%          | 0.492  |
| Expectoration                                | 176     | 69.3%         | 41      | 69.5%           | 0.976  |
| Non-purulent                                 | 142     | 80.7%         | 37      | 90.2%           |        |
| Purulent                                     | 34      | 19.3%         | 4       | 9.8%            | 0.176  |
| Chest pain                                   | 19      | 7.50%         | 6       | 10.20%          | 0.492  |
| Dyspnea                                      | 212     | 83.50%        | 53      | 89.80%          | 0.222  |
| Fever                                        | 102     | 40.20%        | 29      | 49.20%          | 0.207  |
| <b>physical examination</b>                  |         |               |         |                 |        |
| Bilateral basal crackles                     | 20      | (20,22)       | 21      | (20,27)         | 0.001  |
| Heart Rate                                   | 90      | 980,100)      | 94      | (83,110)        | 0.034  |
| Velcro rales                                 | 162     | 63.80%        | 32      | 54.20%          | 0.174  |
| Clubbing                                     | 43      | 16.90%        | 6       | 10.20%          | 0.198  |
| <b>laboratory data</b>                       |         |               |         |                 |        |
| WBC                                          | 9.37    | ±3.64         | 9.63    | ±4.61           | 0.641  |
| N%                                           | 72.6    | ±12.331       | 80.61   | ±12.36          | <0.001 |
| HGB                                          | 134.02  | ±66.52        | 123.66  | ±22.17          | 0.239  |
| PLT                                          | 256.96  | ±94.38        | 229.71  | ±113.29         | 0.056  |
| ALB                                          | 35.1    | (32.4,37.3)   | 32.3    | (28.6, 35.45)   | <0.001 |
| CHOL                                         | 4.27    | (3.515,5.10)  | 4.22    | (3.27, 4.96)    | 0.290. |
| LDL                                          | 2.7     | (2.1,3.4)     | 2.51    | (2.05, 3.2)     | 0.236  |
| CK                                           | 46      | (31,73)       | 45.5    | (28.8, 65.75)   | 0.588  |
| LDH                                          | 281     | (226,357)     | 405     | ' (310, 518.50) | <0.001 |
| HBDH                                         | 228     | (191,300)     | 335     | (262.5,449)     | <0.001 |
| GGT                                          | 31      | (20,49)       | 49      | (27,81)         | 0.001  |
| Urea                                         | 5.29    | (3.99,6.96)   | 7.22    | (4.98,10.58)    | <0.001 |
| CREA                                         | 59.9    | (50.4,70.9)   | 58.3    | (49.7,75.3)     | 0.749  |
| CK-MB                                        | 0.9     | (0.4, 1.8)    | 1.1     | (0.6, 2.2)      | 0.164  |
| CRP                                          | 1.87    | (0.6875,6.95) | 7.24    | (1.99, 13.5)    | <0.001 |
| D-dimer                                      | 884.885 | (364.57,1582) | 1005.62 | ' (600, 3217)   | 0.016  |
| Respiratory failure upon admission           | 165     | 65.00%        | 51      | 86.40%          | 0.001  |
| <b>Treatment and Prognosis</b>               |         |               |         |                 |        |
| ICU admission                                | 17      | 6.70%         | 24      | 40.70%          | <0.001 |
| Bronchoscopy performed                       | 55      | 21.70%        | 22      | 37.30%          | 0.012  |
| Mechanic Ventilation                         | 27      | 10.60%        | 31      | 52.50%          | <0.001 |
| Steroids                                     | 190     | 74.80%        | 48      | 81.40%          | 0.288  |
| Antibiotics                                  | 201     | 79.10%        | 58      | 98.30%          | <0.001 |
| <b>Steroid dose and mortality</b>            |         |               |         |                 |        |
| none                                         | 190     | 74.80%        | 48      | 81.40%          | 0.288  |
| <1mg/kg/d                                    | 113     | 73.40%        | 13      | 22.00%          | <0.001 |
| 1-2mg/kg/d                                   | 60      | 23.60%        | 23      | 39.00%          | 0.016  |

|                        |    |        |    |        |        |
|------------------------|----|--------|----|--------|--------|
| >2mg/kg/d              | 14 | 5.50%  | 12 | 20.30% | <0.001 |
| Hospitalization length | 13 | (9,17) | 11 | (7,26) | 0.397  |

AE-non-IPF: acute exacerbation of interstitial lung disease other than idiopathic pulmonary fibrosis; BMI, body mass index; ICU, intensive care unit; PAH, pulmonary hypertension; WBC, white blood cell; N, neutrophil; HGB, hemoglobin; PLT, platelet; ALB, albumin; CHOL, cholesterol; LDL, low-density lipoprotein; CK, Creatine kinase; LDH, Lactate dehydrogenase; HBDH, Hydroxybutyrate dehydrogenase; GGT,  $\gamma$ -glutamyl transferase; Urea, urea nitrogen; CREA, serum creatinine; CK-MB, creatine kinase isoenzymes; CRP, C-reactive protein;

Supplementary Table 4 Prognostic values of in-hospital mortality-related risk factors by ROC assessment

| variable                                 | AUC   | <i>p</i> | 95CI  |       | sensitivity | specificity |
|------------------------------------------|-------|----------|-------|-------|-------------|-------------|
|                                          |       |          | lower | upper |             |             |
| <b>a AE-ILD(HBDH model)</b>              |       |          |       |       |             |             |
| Coronary artery disease or heart failure | 0.609 | 0.002    | 0.539 | 0.678 | 53.00%      | 68.70%      |
| Respiratory failure upon admission       | 0.584 | 0.018    | 0.519 | 0.649 | 85.50%      | 31.30%      |
| N%                                       | 0.734 | <0.001   | 0.674 | 0.794 | 69.90%      | 66.30%      |
| CHOL                                     | 0.577 | 0.031    | 0.509 | 0.645 | 72.30%      | 42.10%      |
| HBDH                                     | 0.758 | <0.001   | 0.7   | 0.817 | 85.50%      | 56.00%      |
| combination                              | 0.823 | <0.001   | 0.77  | 0.876 | 77.10%      | 76.80%      |
| <b>b AE-ILD(LDH model)</b>               |       |          |       |       |             |             |
| Coronary artery disease or heart failure | 0.609 | 0.002    | 0.539 | 0.678 | 53.00%      | 68.70%      |
| Respiratory failure upon admission       | 0.584 | 0.018    | 0.519 | 0.649 | 85.50%      | 31.30%      |
| N%                                       | 0.734 | <0.001   | 0.674 | 0.794 | 69.90%      | 66.30%      |
| CHOL                                     | 0.577 | 0.031    | 0.509 | 0.645 | 72.30%      | 42.10%      |
| LDH                                      | 0.733 | <0.001   | 0.671 | 0.796 | 72.30%      | 62.20%      |
| combination                              | 0.809 | <0.001   | 0.755 | 0.862 | 78.30%      | 72.40%      |
| <b>c AE-IPF</b>                          |       |          |       |       |             |             |
| PAH                                      | 0.688 | 0.006    | 0.562 | 0.814 | 66.70%      | 71.00%      |
| Fever                                    | 0.689 | 0.006    | 0.561 | 0.817 | 62.50%      | 75.40%      |
| N%                                       | 0.838 | <0.001   | 0.738 | 0.933 | 62.50%      | 91.18%      |
| combination                              | 0.893 | <0.001   | 0.813 | 0.972 | 83.30%      | 87.00%      |
| <b>d AE-non-IPF(HBDH model)</b>          |       |          |       |       |             |             |
| HBDH                                     | 0.779 | <0.001   | 0.717 | 0.841 | 86.40%      | 55.10%      |
| Urea                                     | 0.682 | <0.001   | 0.605 | 0.759 | 62.70%      | 69.70%      |
| ALB                                      | 0.653 | <0.001   | 0.575 | 0.732 | 52.50%      | 73.60%      |
| combination                              | 0.81  | <0.001   | 0.751 | 0.87  | 72.90%      | 76.40%      |
| <b>e AE-non-IPF(LDH model)</b>           |       |          |       |       |             |             |
| Respiratory failure upon admission       | 0.605 | 0.012    | 0.531 | 0.68  | 86.40%      | 34.60%      |
| N%                                       | 0.704 | <0.001   | 0.632 | 0.775 | 69.50%      | 63.00%      |
| LDH                                      | 0.744 | <0.001   | 0.674 | 0.815 | 57.60%      | 79.90%      |
| Urea                                     | 0.682 | <0.001   | 0.605 | 0.759 | 62.70%      | 69.70%      |
| combination                              | 0.808 | <0.001   | 0.747 | 0.869 | 72.90%      | 76.00%      |

AE-ILD: acute exacerbation of interstitial lung disease; AE-IPF: acute exacerbation of idiopathic pulmonary fibrosis; AE-non-IPF: acute exacerbation of interstitial lung disease other than IPF; N%, neutrophil%; CHOL, cholesterol; HBDH, hydroxybutyrate dehydrogenase; LDH, Lactate dehydrogenase; PAH, pulmonary hypertension; ALB, albumin; Urea, urea nitrogen. 95%CI, 95% Confidence interval; AUC, area under the curve.
